# Supplementary material
Source: PubMed Central journal article supplement (PMC6093974)
Supplement: Population_survey_about_dementia_final_questions.pdf [file Population_survey_about_dementia_final_questions.pdf]

What does the Australian general public know about treatments for dementia? A population survey\_ final questions

1. Do you have a family member who has had dementia? (parent, grandparent, cousin, aunt/uncle, sibling)
2. Please type in any treatments you are aware of that improve quality of life for people with dementia.... (free text)
3. How likely is it that the following treatments are beneficial for people with dementia who still live in their own homes?

a. Regular exercise

|             |                 |                 |                   |            |
|-------------|-----------------|-----------------|-------------------|------------|
| Very likely | Somewhat likely | A little likely | Not at all likely | Don't know |
|-------------|-----------------|-----------------|-------------------|------------|

b. Brain training (e.g. computer program, crosswords, card games)

|             |                 |                 |                   |            |
|-------------|-----------------|-----------------|-------------------|------------|
| Very likely | Somewhat likely | A little likely | Not at all likely | Don't know |
|-------------|-----------------|-----------------|-------------------|------------|

c. Healthy diet

|             |                 |                 |                   |            |
|-------------|-----------------|-----------------|-------------------|------------|
| Very likely | Somewhat likely | A little likely | Not at all likely | Don't know |
|-------------|-----------------|-----------------|-------------------|------------|

d. Education and training for family and friends in caregiving

|             |                 |                 |                   |            |
|-------------|-----------------|-----------------|-------------------|------------|
| Very likely | Somewhat likely | A little likely | Not at all likely | Don't know |
|-------------|-----------------|-----------------|-------------------|------------|

e. Medications

|             |                 |                 |                   |            |
|-------------|-----------------|-----------------|-------------------|------------|
| Very likely | Somewhat likely | A little likely | Not at all likely | Don't know |
|-------------|-----------------|-----------------|-------------------|------------|

f. Heart health (e.g. managing blood pressure, cholesterol and blood sugar levels)

|             |                 |                 |                   |            |
|-------------|-----------------|-----------------|-------------------|------------|
| Very likely | Somewhat likely | A little likely | Not at all likely | Don't know |
|-------------|-----------------|-----------------|-------------------|------------|
